# Supplementary material for: Perspectives from designated family caregivers of critically ill adult patients during the COVID-19 pandemic: A qualitative interview study
Source: PubMed Central journal article supplement (PMC9514636; doi:10.1371/journal.pone.0275310), 2022-09-27

# PLOS ONE

## Perspectives from Designated Family Caregivers of Critically Ill Adult Patients During the COVID-19 Pandemic: A Qualitative Interview Study --Manuscript Draft--

|                                                                                                                                                                                                                            |                                                                                                                                                                                                                                                                                                                                                                                                                                                                                                                                                                                                                                                                                                                                                                                                                                                                                                                                                                                                                                                                                                                                                                                                                                                                                                                                                                                                                                                                                                                                                                                                                                                                                                                       |
|----------------------------------------------------------------------------------------------------------------------------------------------------------------------------------------------------------------------------|-----------------------------------------------------------------------------------------------------------------------------------------------------------------------------------------------------------------------------------------------------------------------------------------------------------------------------------------------------------------------------------------------------------------------------------------------------------------------------------------------------------------------------------------------------------------------------------------------------------------------------------------------------------------------------------------------------------------------------------------------------------------------------------------------------------------------------------------------------------------------------------------------------------------------------------------------------------------------------------------------------------------------------------------------------------------------------------------------------------------------------------------------------------------------------------------------------------------------------------------------------------------------------------------------------------------------------------------------------------------------------------------------------------------------------------------------------------------------------------------------------------------------------------------------------------------------------------------------------------------------------------------------------------------------------------------------------------------------|
| <b>Manuscript Number:</b>                                                                                                                                                                                                  | PONE-D-21-35872                                                                                                                                                                                                                                                                                                                                                                                                                                                                                                                                                                                                                                                                                                                                                                                                                                                                                                                                                                                                                                                                                                                                                                                                                                                                                                                                                                                                                                                                                                                                                                                                                                                                                                       |
| <b>Article Type:</b>                                                                                                                                                                                                       | Research Article                                                                                                                                                                                                                                                                                                                                                                                                                                                                                                                                                                                                                                                                                                                                                                                                                                                                                                                                                                                                                                                                                                                                                                                                                                                                                                                                                                                                                                                                                                                                                                                                                                                                                                      |
| <b>Full Title:</b>                                                                                                                                                                                                         | Perspectives from Designated Family Caregivers of Critically Ill Adult Patients During the COVID-19 Pandemic: A Qualitative Interview Study                                                                                                                                                                                                                                                                                                                                                                                                                                                                                                                                                                                                                                                                                                                                                                                                                                                                                                                                                                                                                                                                                                                                                                                                                                                                                                                                                                                                                                                                                                                                                                           |
| <b>Short Title:</b>                                                                                                                                                                                                        | Perspectives from Designated Family Caregivers of Critically Ill Adult Patients During the COVID-19 Pandemic                                                                                                                                                                                                                                                                                                                                                                                                                                                                                                                                                                                                                                                                                                                                                                                                                                                                                                                                                                                                                                                                                                                                                                                                                                                                                                                                                                                                                                                                                                                                                                                                          |
| <b>Corresponding Author:</b>                                                                                                                                                                                               | Kirsten M. Fiest<br>University of Calgary<br>Calgary, CANADA                                                                                                                                                                                                                                                                                                                                                                                                                                                                                                                                                                                                                                                                                                                                                                                                                                                                                                                                                                                                                                                                                                                                                                                                                                                                                                                                                                                                                                                                                                                                                                                                                                                          |
| <b>Keywords:</b>                                                                                                                                                                                                           | Critical Care; Family; Interviews; COVID-19; Restricted Visitation                                                                                                                                                                                                                                                                                                                                                                                                                                                                                                                                                                                                                                                                                                                                                                                                                                                                                                                                                                                                                                                                                                                                                                                                                                                                                                                                                                                                                                                                                                                                                                                                                                                    |
| <b>Abstract:</b>                                                                                                                                                                                                           | <p><b>Background:</b> Family visitation in intensive care units (ICU) has been impacted by the severe acute respiratory syndrome coronavirus 2 (COVID-19) pandemic. While studies report on perceptions of families completely restricted from ICUs, little is known about the burden experienced by designated family caregivers allowed to visit their critically ill loved one. This study sought the perspectives of family caregivers of critically ill patients on the impact of one-person designated visitor policies mandated in ICUs during the COVID-19 pandemic.</p> <p><b>Methods:</b> Throughout the study period a restricted visitation policy was mandated capturing the first and second wave of the pandemic that allowed one designated family caregiver (i.e., spouses or adult children) per patient to visit the ICU. Designated family caregivers of critically ill patients admitted to ICU September 2020 to November 2020 took part in individual 60-minute, semi-structured interviews at 6-months after discharge from the index ICU admission. Themes from family interviews were summarized with representative quotations.</p> <p><b>Results:</b> Key themes identified following thematic analysis from six participants included: one visitor rule, patient advocate role, information needs, emotional distress, strategies for coping with challenges, practicing empathy, and appreciation of growth.</p> <p><b>Conclusion:</b> Designated family caregivers of critically ill patients admitted to ICU during the COVID-19 pandemic perceived a complex and highly stressful experience. Support from ICU family liaisons and psychologists may help ameliorate the impact.</p> |
| <b>Order of Authors:</b>                                                                                                                                                                                                   | <p>Stephana J. Moss</p> <p>Karla D. Krewulak</p> <p>Henry T. Stelfox</p> <p>Scott B. Patten</p> <p>Christopher J Doig</p> <p>Jeanna Parsons Leigh</p> <p>Kirsten M. Fiest</p>                                                                                                                                                                                                                                                                                                                                                                                                                                                                                                                                                                                                                                                                                                                                                                                                                                                                                                                                                                                                                                                                                                                                                                                                                                                                                                                                                                                                                                                                                                                                         |
| <b>Additional Information:</b>                                                                                                                                                                                             |                                                                                                                                                                                                                                                                                                                                                                                                                                                                                                                                                                                                                                                                                                                                                                                                                                                                                                                                                                                                                                                                                                                                                                                                                                                                                                                                                                                                                                                                                                                                                                                                                                                                                                                       |
| <b>Question</b>                                                                                                                                                                                                            | <b>Response</b>                                                                                                                                                                                                                                                                                                                                                                                                                                                                                                                                                                                                                                                                                                                                                                                                                                                                                                                                                                                                                                                                                                                                                                                                                                                                                                                                                                                                                                                                                                                                                                                                                                                                                                       |
| <b>Financial Disclosure</b>                                                                                                                                                                                                | SJM was supported by a Canadian Institutes of Health Research Doctoral Research Award. The funder had no role in study design, data collection and analysis, decision to publish, or preparation of the manuscript; no financial relationships with any organizations that might have an interest in the submitted work in the previous three years; no other relationships or activities that could have influenced the submitted work.                                                                                                                                                                                                                                                                                                                                                                                                                                                                                                                                                                                                                                                                                                                                                                                                                                                                                                                                                                                                                                                                                                                                                                                                                                                                              |
| Enter a financial disclosure statement that describes the sources of funding for the work included in this submission. Review the <a href="#">submission guidelines</a> for detailed requirements. View published research |                                                                                                                                                                                                                                                                                                                                                                                                                                                                                                                                                                                                                                                                                                                                                                                                                                                                                                                                                                                                                                                                                                                                                                                                                                                                                                                                                                                                                                                                                                                                                                                                                                                                                                                       |

Need date, precise period

articles from [PLOS ONE](#) for specific examples.

This statement is required for submission and **will appear in the published article** if the submission is accepted. Please make sure it is accurate.

#### Unfunded studies

Enter: *The author(s) received no specific funding for this work.*

#### Funded studies

Enter a statement with the following details:

- Initials of the authors who received each award
- Grant numbers awarded to each author
- The full name of each funder
- URL of each funder website
- Did the sponsors or funders play any role in the study design, data collection and analysis, decision to publish, or preparation of the manuscript?
- **NO** - Include this sentence at the end of your statement: *The funders had no role in study design, data collection and analysis, decision to publish, or preparation of the manuscript.*
- **YES** - Specify the role(s) played.

\* typeset

#### Competing Interests

Use the instructions below to enter a competing interest statement for this submission. On behalf of all authors, disclose any [competing interests](#) that could be perceived to bias this work—acknowledging all financial support and any other relevant financial or non-financial competing interests.

This statement is **required** for submission and **will appear in the published article** if the submission is accepted. Please make sure it is accurate and that any funding sources listed in your Funding Information later in the submission form are also declared in your Financial Disclosure statement.

The authors have declared that no competing interests exist.

View published research articles from [PLOS ONE](#) for specific examples.

#### **NO authors have competing interests**

Enter: *The authors have declared that no competing interests exist.*

#### **Authors with competing interests**

Enter competing interest details beginning with this statement:

*I have read the journal's policy and the authors of this manuscript have the following competing interests: [insert competing interests here]*

\* typeset

#### **Ethics Statement**

Enter an ethics statement for this submission. This statement is required if the study involved:

- Human participants
- Human specimens or tissue
- Vertebrate animals or cephalopods
- Vertebrate embryos or tissues
- Field research

Write "N/A" if the submission does not require an ethics statement.

General guidance is provided below. Consult the [submission guidelines](#) for detailed instructions. **Make sure that all information entered here is included in the Methods section of the manuscript.**

The Conjoint Health Research Ethics Board at the University of Calgary approved this study (Ethics ID: REB19-1000). Informed and oral consent were sought for all participants of the study.

**Format for specific study types**

**Human Subject Research (involving human participants and/or tissue)**

- Give the name of the institutional review board or ethics committee that approved the study
- Include the approval number and/or a statement indicating approval of this research
- Indicate the form of consent obtained (written/oral) or the reason that consent was not obtained (e.g. the data were analyzed anonymously)

**Animal Research (involving vertebrate animals, embryos or tissues)**

- Provide the name of the Institutional Animal Care and Use Committee (IACUC) or other relevant ethics board that reviewed the study protocol, and indicate whether they approved this research or granted a formal waiver of ethical approval
- Include an approval number if one was obtained
- If the study involved *non-human primates*, add *additional details* about animal welfare and steps taken to ameliorate suffering
- If anesthesia, euthanasia, or any kind of animal sacrifice is part of the study, include briefly which substances and/or methods were applied

**Field Research**

Include the following details if this study involves the collection of plant, animal, or other materials from a natural setting:

- Field permit number
- Name of the institution or relevant body that granted permission

**Data Availability**

Authors are required to make all data underlying the findings described fully available, without restriction, and from the time of publication. PLOS allows rare exceptions to address legal and ethical concerns. See the [PLOS Data Policy](#) and [FAQ](#) for detailed information.

No - some restrictions will apply

A Data Availability Statement describing where the data can be found is required at submission. Your answers to this question constitute the Data Availability Statement and **will be published in the article**, if accepted.

**Important:** Stating 'data available on request from the author' is not sufficient. If your data are only available upon request, select 'No' for the first question and explain your exceptional situation in the text box.

Do the authors confirm that all data underlying the findings described in their manuscript are fully available without restriction?

**Describe where the data may be found in full sentences. If you are copying our sample text, replace any instances of XXX with the appropriate details.**

- If the data are **held or will be held in a public repository**, include URLs, accession numbers or DOIs. If this information will only be available after acceptance, indicate this by ticking the box below. For example: *All XXX files are available from the XXX database (accession number(s) XXX, XXX).*
- If the data are all contained **within the manuscript and/or Supporting Information files**, enter the following: *All relevant data are within the manuscript and its Supporting Information files.*
- If neither of these applies but you are able to provide **details of access elsewhere**, with or without limitations, please do so. For example:

*Data cannot be shared publicly because of [XXX]. Data are available from the XXX Institutional Data Access / Ethics Committee (contact via XXX) for researchers who meet the criteria for access to confidential data.*

*The data underlying the results presented in the study are available from (include the name of the third party*

Data cannot be shared publicly because of patient confidentiality. Data may be available upon reasonable request from the University of Calgary research ethics board and Alberta Health Services research and innovation administration (contact via chreb@ucalgary.ca and research.administration@ahs.ca) for researchers who meet the criteria for access to confidential data.

*and contact information or URL).*

- This text is appropriate if the data are owned by a third party and authors do not have permission to share the data.

\* typeset

Additional data availability information:

Manuscript

1  
2 **Perspectives from Designated Family Caregivers of Critically**  
3 **Ill Adult Patients During the COVID-19 Pandemic: A**  
4 **Qualitative Interview Study**

5  
6 *Stephana J. Moss, MSc PhD<sup>1,2,3,4</sup>; Karla D. Krewulak, PhD<sup>1,2</sup>; Henry T.*  
7 *Stelfox, MD, PhD<sup>1,2,3,5</sup>; Scott B. Patten, MD PhD<sup>1,3,4,5,6</sup>; Christopher J. Doig,*  
8 *MD MSc<sup>1,2,5</sup>; Jeanna Parsons Leigh, PhD<sup>2,6</sup>; Kirsten M. Fiest, PhD<sup>1,2,3,4,7</sup>*

9  
10  
11  
12 <sup>1</sup>Department of Community Health Sciences, Cumming School of Medicine, University of  
13 Calgary, Calgary, AB, Canada  
14 <sup>2</sup>Department of Critical Care Medicine, University of Calgary and Alberta Health Services,  
15 Calgary, AB, Canada  
16 <sup>3</sup>O'Brien Institute for Public Health, University of Calgary, Calgary, AB, Canada  
17 <sup>4</sup>Hotchkiss Brain Institute, University of Calgary, Calgary, AB, Canada  
18 <sup>5</sup>Alberta Health Services, Edmonton, AB, Canada  
19 <sup>6</sup>Faculty of Health, School of Health Administration, Dalhousie University, Halifax, NS, Canada  
20 <sup>7</sup>Department of Psychiatry, Cumming School of Medicine, University of Calgary, Calgary, AB,  
21 Canada

22

23

24

25

26 **Moss:** stephana.moss@ucalgary.ca27 **Krewulak:** kkrewula@ucalgary.ca

Manuscript

28 **Stelfox:** [tstelfox@ucalgary.ca](mailto:tstelfox@ucalgary.ca)

29 **Patten:** [patten@ucalgary.ca](mailto:patten@ucalgary.ca)

30 **Doig:** [cdoig@ucalgary.ca](mailto:cdoig@ucalgary.ca)

31 **Parsons Leigh:** [J.ParsonsLeigh@dal.ca](mailto:J.ParsonsLeigh@dal.ca)

32 **Fiest:** [kmfiest@ucalgary.ca](mailto:kmfiest@ucalgary.ca) (corresponding)

33

34

35



36 **ABSTRACT**

37 **Background:** Family visitation in intensive care units (ICU) has been impacted by the  
38 severe acute respiratory syndrome coronavirus 2 (COVID-19) pandemic. While studies report  
39 on perceptions of families completely restricted from ICUs, little is known about the burden  
40 experienced by designated family caregivers allowed to visit their critically ill loved one. This  
41 study sought the perspectives of family caregivers of critically ill patients on the impact of  
42 one-person designated visitor policies mandated in ICUs during the COVID-19 pandemic.

43 **Methods:** Throughout the study period a restricted visitation policy was mandated  
44 capturing the first and second wave of the pandemic that allowed one designated family  
45 caregiver (i.e., spouses or adult children) per patient to visit the ICU. Designated family  
46 caregivers of critically ill patients admitted to ICU September 2020 to November 2020 took  
47 part in individual 60-minute, semi-structured interviews at 6-months after discharge from the  
48 index ICU admission. Themes from family interviews were summarized with representative  
49 quotations.

50 **Results:** Key themes identified following thematic analysis from six participants included:

51 one visitor rule, patient advocate role, information needs, emotional distress, strategies for

52 coping with challenges, practicing empathy, and appreciation of growth.

53 **Conclusion:** Designated family caregivers of critically ill patients admitted to ICU during

54 the COVID-19 pandemic perceived a complex and highly stressful experience. Support from

55 ICU family liaisons and psychologists may help ameliorate the impact.

56 **Key Words:** Critical Care; Family; Interviews; COVID-19; Restricted Visitation

57 **INTRODUCTION**

58 Critically ill patients admitted to the intensive care unit (ICU) are among the sickest patients  
59 in the healthcare system given their need for urgent treatment with life sustaining  
60 technologies [1]. Family caregivers of critically ill patients experience distress, as witnessing  
61 critical illness and intense ICU therapies can elicit feelings of helplessness [2]. Family  
62 caregivers frequently experience long-lasting, negative psychological consequences, including  
63 anxiety, depression, post-traumatic stress disorder, emotional distress, and sleep disturbances  
64 [3].

65  
66 In response to the burden of critical illness for family caregivers of ICU patients, the Society  
67 of Critical Care Medicine Guideline for Patient and Family-Centred Care recommends regular  
68 visitation between family caregivers and ICU patients to improve outcomes (e.g., distress) [4,  
69 5] and experiences (e.g., satisfaction) [6, 7] among ICU patients and their families. Most  
70 hospitals, including the intensive care units, enacted restricted visitation policies as part of  
71 infection control measures [8] to limit spread of the COVID-19 virus, reduce use of personal  
72 protective equipment, and to facilitate organizing care [9, 10]. Well-intentioned, restricted  
73 visitation policies may have unintended negative consequences on family caregivers, such as

74 grief over inadequate communication and sparse involvement in the provision of care [11,  
75 12]. Designated family caregivers of critically ill patients admitted to ICUs that mandated  
76 one-person designated visitor policies faced additional challenges when having to deliver  
77 medical information to other family members that were restricted from visiting [13, 14].

78

79 Restricted visitation in the ICU during the COVID-19 pandemic may lead to long-term  
80 detriment [15]. Perspectives from designated family caregivers of critically ill patients are  
81 unknown. The objective of this study was to describe perspectives of designated family  
82 caregivers of critically ill patients on the impact of one-person designated visitor policies  
83 mandated in ICUs during the COVID-19 pandemic.

84

## 85 **METHODS**

### 86 **Study Design**

87 This qualitative study was conducted at Foothills Medical Centre ICU (Calgary, AB, Canada)  
88 between September 2020 to November 2020. A restricted visitation policy was mandated  
89 throughout the study period (March 2020 to May 2021); capturing the (entire) first and

90 second waves and (part of the) third wave of the pandemic that allowed one designated  
91 family caregiver per patient to visit. We used a qualitative descriptive approach [16] with  
92 data collected from semi-structured interviews with designated family caregivers (i.e.,  
93 spouses or adult children designated to visit the ICU routinely) of critically ill patients in  
94 accordance with the Consolidated Criteria for Reporting Qualitative Research (COREQ) (S.  
95 Table 1) [17]. The Conjoint Health Research Ethics Board at the University of Calgary  
96 approved this study (Ethics ID: REB19-1000). Informed consent and oral consent were sought  
97 from all participants that agreed to be interviewed.

98

## 99 **Selection and Description of Participants**

100 We used a convenience sample, of designated family caregivers who participated in another  
101 study by our group and indicated interest in being contacted to participate in additional  
102 research projects. Family caregivers were adults ( $\geq 18$  years), able to understand and  
103 communicate in English, and able to provide informed consent. We invited family caregivers  
104 using the contact information they provided (e-mail or telephone).

105

## 106 **Semi-structured Interview Guide**

107 A multidisciplinary research team (patient partner (B.S.), doctoral student (S.M.), research  
108 assistant (I.Y.), research associate (K.K), epidemiologist (K.F.), and qualitative research expert  
109 (J.P.L.)) created a draft semi-structured interview guide based on research experience and  
110 relevant literature [14, 18, 19]. For feedback and to ensure quality control, draft semi-  
111 structured interview guides were presented to a patient partner (M.A., a community member  
112 involved with our research team) and their family caregiver (J.A.), as well as a research  
113 coordinator (C.G.), all of whom had no prior involvement in the research study. A revised  
114 interview guide was then drafted, and pilot tested independently on three occasions in  
115 interviews with two critical care nurses (K.W., V.O.), and an intensivist (N.J.). The set interview  
116 guide was refined iteratively based on feedback from pilot interviews; no further edits were  
117 required after this point (S. Table 2).

118

## 119 **Data Collection**

How was selected the study population ? How many patients was  
asked to participate before reaching 6 people?

120 Demographic data on patients and family caregivers was collected upon enrollment in the  
121 larger RCT. Telephone interviews were conducted by S.M. who has experience planning and  
122 facilitating semi-structured interviews. Two days prior to each interview, participants (with e-  
123 mail access) were sent information about the interview objectives. Participant oral consent

124 was obtained by the research team prior to the start of each interview. All interviews were  
125 conducted within 60-minutes, audio recorded, transcribed verbatim, de-identified, and  
126 imported to NVivo-12 (QSR International, Melbourne, Australia) for data management.

127

## 128 **Data Analysis**

129 We analyzed demographic data by using descriptive statistics. All variables were categorical  
130 and reported as counts and proportions. Analysis of qualitative data was conducted  
131 concurrently and iteratively using a thematic synthesis approach published by Braun and  
132 Clarke [20]. We used a data-driven inductive approach to coding [21] that allowed our  
133 working knowledge of the topic [22] to guide the structure of interview discussions while  
134 permitting themes to emerge directly from the data [23]. The coding process included two  
135 coders (S.M., K.K.) who carefully read all transcripts before coding one-third of the data set  
136 to generate initial codes. Once the initial set of codes was developed, coders switched  
137 transcripts to ensure that all were coded in duplicate. The two coders searched for themes  
138 by collating codes across the data set and met biweekly for one month to refine themes and  
139 discuss progress. Two participants were provided with a copy of the final list of themes and  
140 sub-themes to review and comment on to ensure credibility, accuracy, and validity. We

141 formally compared themes across participants and compared interpretations across

142 researchers in order to ensure analytic rigor.

143

## 144 **RESULTS**

### 145 **Participants**

146 Ten designated family caregivers participated in another study by our group from September

147 2020 to November 2020, of which eight ( $n=8$ , 80%) indicated interest in being contacted to

148 participate in additional research projects through a telephone call ( $n=2$ , 25%) or an e-mail

149 invitation ( $n=6$ , 75%) (Figure 1). Six (75%) family caregivers agreed to participate in the

150 telephone interview. Interviews were conducted at an average of 6.3 months (standard

151 deviation [SD] 2.3) post-ICU discharge.

To be in methodology. Need reference  
from original study.

152

153 Family caregivers were mostly female ( $n=4$ , 67%), of North American descent ( $n=4$ , 67%),

154 and had completed some university/college, without receiving a degree ( $n=4$ , 67%). Half

155 ( $n=3$ , 50%) of the participants were spouses of critically ill patients (Table 1). Some family

156 caregivers ( $n=2$ , 33%) self-reported being diagnosed or treated for depression (prior to ICU



157 admission) and half ( $n=3$ , 50%) self-reported being diagnosed or treated for anxiety (prior to

158 ICU admission). Critically ill patients were mostly male ( $n=4$ , 67%) with either some high

159 school ( $n=2$ , 33%) or a Master's degree ( $n=2$ , 33%). No patient was diagnosed with the

160 COVID-19 virus prior to or during their ICU stay.

These are data describing the patient, not the study population . To clarify

161

162 **Table 1.** Demographics of designated family caregiver participants and their critically ill  
 163 loved one admitted to an intensive care unit during the COVID-19 pandemic

164

| Demographic                                       | Family Caregivers<br>(N=6) | Critically Ill Patients<br>(N=6) |
|---------------------------------------------------|----------------------------|----------------------------------|
| <i>Sex<sup>1</sup></i>                            |                            |                                  |
| Male                                              | 2 (33.3%)                  | 4 (66.7%)                        |
| Female                                            | 4 (66.7%)                  | 2 (33.3%)                        |
| <i>Gender<sup>2</sup></i>                         |                            |                                  |
| Male                                              | 2 (33.3%)                  | 4 (66.7%)                        |
| Female                                            | 4 (66.7%)                  | 2 (33.3%)                        |
| <i>Ethnic or cultural group<sup>3</sup></i>       |                            |                                  |
| Other North American                              | 4 (66.7%)                  | 3 (50.0%)                        |
| First Nations                                     | 1 (16.7%)                  | 0 (00.0%)                        |
| Eastern European                                  | 2 (33.3%)                  | 2 (33.3%)                        |
| Western European                                  | 2 (33.3%)                  | 1 (16.7%)                        |
| British Isles                                     | 1 (16.7%)                  | 0 (00.0%)                        |
| <i>Education<sup>4</sup></i>                      |                            |                                  |
| Some high school                                  | 0 (00.0%)                  | 2 (33.3%)                        |
| High school graduate                              | 0 (00.0%)                  | 1 (16.7%)                        |
| Some university/college (no degree)               | 4 (66.7%)                  | 0 (00.0%)                        |
| Bachelor's degree                                 | 2 (33.3%)                  | 0 (00.0%)                        |
| Master's degree                                   | 0 (00.0%)                  | 2 (33.3%)                        |
| Professional degree                               | 0 (00.0%)                  | 1 (16.7%)                        |
| <i>Relationship to patient</i>                    |                            |                                  |
| Spouse or Common-Law                              | 3 (50.0%)                  | --                               |
| Adult Child                                       | 3 (50.0%)                  | --                               |
| <i>Considered primary caregiver<sup>5</sup></i>   |                            |                                  |
| Yes                                               | 6 (100.0%)                 | --                               |
| No                                                | 0 (00.0%)                  | --                               |
| <i>Clinically relevant depression<sup>6</sup></i> |                            |                                  |
| Yes                                               | 2 (33.3%)                  | --                               |
| No                                                | 4 (66.7%)                  | --                               |
| <i>Clinically relevant anxiety<sup>6</sup></i>    |                            |                                  |
| Yes                                               | 3 (50.0%)                  | --                               |
| No                                                | 3 (50.0%)                  | --                               |

165 Numbers are counts with percentages. Dashes indicate that the question was not asked.

166 <sup>1</sup>Recorded at birth

167 <sup>2</sup>Reported as gender identity

168 <sup>3</sup>Multiple selections per participant were allowed

169 <sup>4</sup>Highest degree received

170 <sup>5</sup>During patient stay in the ICU and after discharge from hospital

171 <sup>6</sup>Relating to direct medical treatment by a healthcare professional prior to ICU admission as self-reported by the participant

172 **Family Caregiver Perceptions**

173 Designated family caregivers of critically ill patients admitted to ICU during the COVID-19

174 pandemic perceived a complex and highly stressful experience. **Support from ICU family**

Comment from the study population or author?

175 **liaisons and psychologists may help ameliorate the impact.** Participants described their

176 experiences with having to process their loved one's prognosis and treatment information,

177 engage in shared decision making, and then relay information to family members who were

178 not allowed to visit.

179

180 Seven themes related to caring for a critically ill patient as the designated family caregiver

Confused, to be explain

181 during the COVID-19 pandemic were identified in the data: (1) **one visitor rule;** (2) **patient**

182 **advocate role;** (3) **information needs;** (4) **emotional distress;** (5) **strategies for coping with**

183 **challenges;** (6) **practicing empathy;** and (7) **appreciation of growth** (Table 2).

Each point needs a small definition and how the classification was made

184

185 **Table 2.** Perspectives of designated family caregivers on caring for critically ill loved ones  
 186 admitted to an intensive care unit during the COVID-19 pandemic

187

| Themes                                       | Quotes                                                                                                                                                                                                                                                                                                                                                                                                                                                                                                                                                                                                                                                                                                                                                                                                                                                                                                                                                                |
|----------------------------------------------|-----------------------------------------------------------------------------------------------------------------------------------------------------------------------------------------------------------------------------------------------------------------------------------------------------------------------------------------------------------------------------------------------------------------------------------------------------------------------------------------------------------------------------------------------------------------------------------------------------------------------------------------------------------------------------------------------------------------------------------------------------------------------------------------------------------------------------------------------------------------------------------------------------------------------------------------------------------------------|
| <b>One Visitor Rule</b>                      | <p><i>At that time, one visitor was allowed that had to be the same visitor. So, our children were not allowed to visit, which was really hard on them all. Okay, we thought, we have to deal with this. (Spouse)</i></p> <p><i>I just couldn't imagine him being there all by himself—I just had to be there, it was very important to me. (Son)</i></p> <p><i>It was absolutely harder because of COVID. I felt like I had to be there all of the time because only one person was allowed, and I didn't ever want him to feel like he was alone. He didn't understand why the kids couldn't be there—that made it very hard, not being able to have that support. (Spouse)</i></p>                                                                                                                                                                                                                                                                                 |
| <b>Patient Advocate Role</b>                 | <p><i>I was there and I saw the lung exercises, so then I could quiz him later on. I asked, did you do it, do you remember how long you're supposed to do it? You're supposed to do it every hour. Are you doing it? Those people out there really care, and I want you to do your lung exercise. But what I know is that is that was just a phone call [if no visitors were allowed in the ICU], I wouldn't know those specifics and I wouldn't be able to watch and be an advocate. (Spouse)</i></p> <p><i>Even though I was the only one in there I was never asked to pipe up, to tell them about what he is really like, to advocate—I didn't know how you know, being alone. (Spouse)</i></p> <p><i>The lessons learned is I wish I would have been more involved in rounding. I wish I would've been more invited. I know it's hard right now, given [COVID-19] restrictions, but if I was even just listening, I would have felt included. (Daughter)</i></p> |
| <b>Information Needs</b>                     | <p><i>I'm a very curious person and I like to know what's going on. So, I spent a long time asking questions whenever they were there. The staff was very good at giving us answers, but yet a lot of the time we were waiting—sitting and waiting or going back and forth and waiting for them to come to your patient. (Daughter)</i></p> <p><i>I was afraid to ask questions. I felt isolated. Not a lot of information was given. I felt intimidated. (Spouse)</i></p> <p><i>I had to give daily updates to everybody. I would wait for a report and then I would go out to call everybody, let them know how he was doing. So many calls—I had to make myself a pretty decent schedule. The only things I had time for were to come in [to the ICU], make all my calls, go back to the hotel, turn on TV for a few minutes and then go to bed. (Spouse)</i></p>                                                                                                  |
| <b>Emotional Distress</b>                    | <p><i>It was an emotional and very difficult experience. I felt scared, left out, kind of anxious. (Daughter)</i></p> <p><i>I spent many hours just sitting there wondering, you know, listening to machines, beeping, very loudly. I was on an emotional rollercoaster—I couldn't find solitude. (Spouse)</i></p> <p><i>I think that you fool yourself into thinking that you're okay. I'm okay. I'm okay. I'm okay, I kept saying. You just are running on adrenaline, right. I didn't relax until he left ICU and I know it's the times, right. I had to tell myself that it was fine...initially anyway. (Spouse)</i></p>                                                                                                                                                                                                                                                                                                                                         |
| <b>Strategies for Coping with Challenges</b> | <p><i>I knew my lifestyle. I had to eat better, you know, as far as getting some sleep at night. And so, sometimes I wouldn't come back a second time, and there was one time I remember I actually felt really guilty. (Son)</i></p> <p><i>I'm very scheduled. So, I made myself a daily schedule. Mostly for my own mental health. (Son)</i></p> <p><i>I made myself a decent schedule... day in and day out. That helped for all of us. (Spouse)</i></p> <p><i>I wrote everything down. I would write it down, what the care team said for the entire day, and then at end of each day I would write everything in a second book that I left for my husband so that he could look back and find what he needed to know, even when I wasn't there. (Spouse)</i></p>                                                                                                                                                                                                 |
| <b>Practicing Empathy</b>                    | <p><i>Being able to talk to them [the ICU care team] provided a feeling of solidarity. They were going through a hard time. You know, you do take an interest in other people who are always there. The talking helped, like teamwork. (Son)</i></p> <p><i>I would suggest a [virtual] peer group of people that have to deal with these issues, so we can exchange coping mechanisms and ideas, and show empathy for others, you know, that would be helpful. (Spouse)</i></p>                                                                                                                                                                                                                                                                                                                                                                                                                                                                                       |
| <b>Appreciation of Growth</b>                | <p><i>I mean, once you've been through these stressful, traumatic, draining situations, you look back and reflect and think, great, I can do tough things because I've dealt with a lot. (Spouse)</i></p>                                                                                                                                                                                                                                                                                                                                                                                                                                                                                                                                                                                                                                                                                                                                                             |

*I'm very happy that it's over. It gets better and I've learned a lot—I've grown and hey, that's not what I was expecting to say. (Son)*

---

189 **One Visitor Rule**

190 Participants from all interviews provided their perspectives on the challenge of adhering to  
191 the one designated visitor policy. Difficult for all, this policy was especially burdensome to  
192 families with young children: "At that time, one visitor was allowed that had to be the same  
193 visitor. So, our children were not allowed to visit, which was really hard on them all."  
194 (Spouse). Most designated family caregivers agreed about the guilt when absent from the  
195 unit: "I just couldn't imagine him being there all by himself—I just had to be there, it was  
196 very important to me" (Adult Child). One family caregiver remarked that not having external  
197 support (present with them in the ICU) was challenging:

198 *It was absolutely harder because of COVID. I felt like I had to be there all of the time*  
199 *because only one person was allowed, and I didn't ever want him to feel like he was*  
200 *alone. He didn't understand why the kids couldn't be there—that made it very hard, not*  
201 *being able to have that support.* (Spouse)

202

203 **Patient Advocate Role**

204 All designated family caregivers shared their perspectives on the importance of being  
205 present that provided an opportunity for the family caregiver (who knows the patient best)

206 to weigh in on subtleties they may notice in the patient's overall demeanor. Family

207 caregivers took opportunities to be actively involved in care of their loved one:

208 *I was there and I saw the breathing exercises, so then I could quiz him later on. I asked,*  
209 *did you do it, do you remember how long you're supposed to do it? You're supposed to*  
210 *do it every hour. Are you doing it? Those people out there really care, and I want you to*  
211 *do your breathing exercise. But what I know is that if that was just a phone call [if no*  
212 *visitors were allowed in the ICU], I wouldn't know those specifics and I wouldn't be able*  
213 *to watch and be an advocate. (Spouse)*

214 In contrast, some family caregivers described feeling distress about being involved in patient  
215 care and were waiting to be asked to weigh in. One family caregiver remarked: "Even though  
216 I was the only one there I was never asked to pipe up, to tell them about what he is really  
217 like, to advocate—I didn't know how you know, being alone" (Spouse). The lack of invitation  
218 evoked feelings of isolation in one family caregiver: "The lesson learned is I wish I would  
219 have been more involved in rounding. I wish I would've been more invited. I know it's hard  
220 right now, given [COVID-19] restrictions, but if I was even just listening, I would have felt  
221 included" (Adult Child).

222

223 **Information Needs**

224 Participants shared their need to receive regular and clear information from the healthcare  
225 team regarding their loved one. One family caregiver began to ask questions in order to feel  
226 more involved: "I'm a very curious person and I like to know what's going on. So, I spent a  
227 long time asking questions whenever they were there. The staff was very good at giving us  
228 answers, but yet a lot of the time we were waiting—sitting and waiting or going back and  
229 forth and waiting for them to come to your patient" (Adult Child). However, despite being  
230 present, designated family caregivers felt absent without the support of their family in the  
231 ICU. A spouse pronounced: "I was afraid to ask questions. I felt isolated. Not a lot of  
232 information was given. I felt intimidated" (Spouse). In addition, participants unanimously  
233 described the burden of having to relay medical information to remaining family members  
234 who were not allowed to visit in the ICU. The significance of other family members in the  
235 ICU was conspicuous by their absence:

236 *I had to give daily updates to everybody. I would wait for a report and then I would go*  
237 *out to call everybody, let them know how he was doing. So many calls—I had to make*  
238 *myself a pretty decent schedule. The only things I had time for were to come in [to the*



239 *ICU], make all my calls, go back to the hotel, turn on TV for a few minutes and then go to*

240 *bed. (Spouse)*

241

## 242 **Emotional Distress**

243 Designated family caregivers described feeling emotionally distressed for their critically ill

244 loved one. One family caregiver recalled: "It was an emotional and very difficult experience. I

245 felt scared, left out, kind of anxious" (Adult Child). Families were mindful of the unnatural

246 and lonely feeling of being in the ICU without other family members: "I spent many hours

247 just sitting there wondering, you know, listening to machines, beeping, very loudly. I was on

248 an emotional rollercoaster—I couldn't find solitude" (Spouse). Caring for a critically ill patient

249 without support of other family, during a pandemic, sometimes involved self-affirmations:

250 *I think that you fool yourself into thinking that you're okay. I'm okay. I'm okay. I'm okay, I*

251 *kept saying. You just are running on adrenaline. Right? I didn't relax until he left ICU and I*

252 *know it's the times, right. I had to tell myself that it was fine...initially anyway. (Spouse)*

253

## 254 **Strategies for Coping with Challenges**

255 “Mostly for my own mental health” (Adult Child), while others echoed: “I made myself a  
256 decent schedule... day in and day out. That helped for all of us” (Spouse). When hospitalized,  
257 separated, and isolated at night, one spouse recounted their strategy to cope with the  
258 challenge of restricted visitation:

259 *I wrote everything down. I would write it down, what the care team said for the entire*  
260 *day, and then at end of each day I would write everything in a second book that I left for*  
261 *my husband so that he could look back and find what he needed to know, even when I*  
262 *wasn't there.* (Spouse)

263

## 264 **Practicing Empathy**

265 Participants described practicing empathy with members of the ICU care team, rather than  
266 other family caregivers, as waiting rooms were closed and caregivers from different families  
267 were not allowed to interact in the ICU. Bearing witness to the challenges faced by other  
268 family caregivers, one adult child shared: “Being able to talk to them [the ICU care team]  
269 provided a feeling of solidarity. They were going through a hard time. The talking helped,  
270 like teamwork” (Adult Child). Families recommended potential avenues for designated family  
271 caregivers to provide support to each other throughout restricted visitation: “I would suggest

Manuscript

272 a [virtual] peer group of people that have to deal with these issues, so we can exchange  
273 coping mechanisms and ideas, and show empathy for others, you know, that would be  
274 helpful" (Spouse).

275

## 276 **Appreciation of Growth**

277 All designated family caregivers who participated shared their perspectives of the negative  
278 impact of the pandemic and shared lessons learned from providing care:

279 *I mean, once you've been through these stressful, traumatic, draining situations, you look*  
280 *back and reflect and think, great, I can do tough things because I've dealt with a lot.*

281 (Spouse)

282 In the end, designated family caregivers, tired and isolated, described the influence of being  
283 resilient on their own, personal growth: "I'm very happy that it's over. It gets better and I've  
284 learned a lot—I've grown and hey, that's not what I was expecting to say" (Adult Child).

285

## 286 **DISCUSSION**

287 We conducted a semi-structured interview study to explore perspectives of family caregivers  
288 of critically ill patients on the impact of one-person designated visitor policies mandated in

289 ICUs during the COVID-19 pandemic. Our findings indicated that practices to control spread  
290 of the SARS-CoV-2 virus changed visitation in the ICU, which transformed the way family  
291 caregivers cared for their critically ill loved one. In the context of one-person designated  
292 visitor policies in the ICU, these changes led to complex situations that had communication  
293 and emotional consequences for family caregivers. The unintended repercussions  
294 experienced by designated family caregivers largely hinged on the notion that despite being  
295 physically present, designated family caregivers felt helpless and isolated from the ICU care  
296 team, and guilt related to being the only family member allowed to visit.

297

298 Supporting family caregivers is fundamental to the practice of critical care medicine [6] that  
299 is rarely easy [24] and has been more challenging in the COVID-19 pandemic [25]. Even with  
300 uninterrupted bedside access and idyllic support, family caregivers have high risk of long-  
301 term physical and mental health problems [26]. A one designated visitor policy at our  
302 institution that was similar to mandated policies at other Canadian [27, 28] and American  
303 [29, 30] institutions meant that if two family members were present when their loved one  
304 was admitted, they were forced to choose: who will sit alone, vigil, at the bedside, and who  
305 will walk away, leaving their critically ill family member and grieving partner behind?

306

307 The COVID-19 pandemic resulted in limitations on family caregiver engagement in the ICU  
308 and participation in care that completely reengineered their methods to cope and had  
309 potential implications on their well-being [31-33]. The issue is that public health, without an  
310 understanding of ICU care, broadly directed hospital restrictions usually without an  
311 understanding of potential adverse impact and without input and/or feedback from  
312 healthcare providers [34]. The evidence that these interventions mitigated spread of the virus  
313 (their benefit) was never measured compared to the negative impact to patients and families  
314 against which they were applied (the harm) [35-37]. The data suggests that there was harm,  
315 and that this should be considered for future pandemic planning which needs to include  
316 perspectives from family caregivers on how to best mitigate the negative effects of restricted  
317 visitation [38]. Most research has reported on short-term impacts of restricted visitation  
318 policies, few including perspectives from family caregivers themselves, and longer-term  
319 consequences of restricted visitation policies are unknown [39-41]. Added care for ICU family  
320 caregivers that emphasizes respect, dignity, and humanization, might come in the form of  
321 long-term support plans delivered by ICU family liaison teams [42-44] and psychologists [45-

322 47] that may help to ameliorate the impact of the COVID-19 pandemic on designated family  
323 caregivers of critically ill patients.

324  
325 Prior to mandated restricted visitation policies, studies report families being offered an  
326 increasingly active role in the ICU in the participation in patient care (e.g., hygiene,  
327 orientation, mobility) [48, 49]. This is related to a growing awareness that family caregivers of  
328 ICU patients have specific needs including information to understand the diagnosis,  
329 prognosis, and treatment in the patient [50], and support in dealing with psychological  
330 distress [51]. Participation in care helps to provide families with a feeling of closeness to the  
331 patient [52] that may facilitate their sensemaking about the critical illness [53], thus  
332 alleviating their stress [54]. Performing some patient care usually left to healthcare  
333 professionals may help families to understand the caring nature of ICU treatments, which  
334 may otherwise seem highly invasive [55]. Family participation in care can also play a role in  
335 decreasing feelings of powerlessness [56] and contribute to a sense of usefulness that may  
336 help to alleviate negative mental health consequences such as guilt, grief, or burden [57].  
337 Furthermore, a role in patient care for families may help the care team to emphasize that  
338 families are not just visitors but welcome and appreciated members in the ICU [58].

339 Participation in care is associated with better satisfaction among family caregivers [59]; thus,  
340 it is suggested that healthcare professionals should consider encouraging family caregivers  
341 (who wish to do so) to participate in patient care with the support of the ICU care team [52,  
342 60, 61].

343

344 The strengths of this study include that the interview guide was informed by narratives  
345 reported in the COVID-19 pandemic [62-65], co-designed with researchers, patients, and  
346 clinicians, and tested in a pilot study with critical care nurses and intensivists. Interviews were  
347 conducted individually and at length, which allowed caregiver's time and space to share  
348 perspectives to offer important insights on the psychological burden that afflicts designated  
349 family caregivers. There are limitations to consider when interpreting the findings of our  
350 study. First, the number of participants included in this study was dependent on the interest  
351 of family caregivers in being contacted to participate in additional research projects; other  
352 studies were paused many times to conserve resources (i.e., personal protective equipment,  
353 staff) to combat the COVID-19 pandemic, which limited recruitment. We did not assess non-  
354 designated family members and it is possible that important perspectives were missed.

355 Second, we chose a 6-month follow-up as we were cautious about grief experienced by

356 family caregivers who lost loved ones to critical illness [66, 67]. Third, this is a single-centre  
357 qualitative study including six family caregivers that may not be transportable to other ICU  
358 settings. Additional interviews to collect data past code saturation in order to assess  
359 meaning saturation are required for transferability of our results [68]. Finally, our small  
360 sampling frame did not achieve adequate representation of sex, gender, education, and  
361 socioeconomic status and we were not able to explore sociocultural factors, including  
362 cognitive and linguistic barriers, which might impact communication [69, 70].

363 *It will important to discuss the fear of caregivers of having COVID vs going in Hospital, particularly before  
the Understanding of COVID and introduction of vaccination. Risk vs benefits*

364

## 365 **CONCLUSIONS**

366 Designated family caregivers of critically ill patients in the ICU perceived that restricted  
367 visitation policies mandated to control COVID-19 had unintended negative repercussions.

368 The one-person designated visitor policy meant that the designated family caregiver had to  
369 process their loved one's prognosis and treatment, make life-changing decisions, and then  
370 relay this information to remaining family in addition to coping with their own concerns.

371 Long-term support plans for family caregivers of critically ill patients delivered by ICU family



372 liaison teams and psychologists may help to ameliorate the impact of the COVID-19

373 pandemic on designated family caregivers of critically ill patients. Further research with larger  
During COVID or all the time? Need to  
be address in discussion.

374 and more diverse sample sizes are required to validate our findings from this hypothesis-

375 generating work.

376

377 **DECLARATIONS**

378

379 **Ethics approval and consent to participate:** The Conjoint Health Research Ethics Board at  
380 the University of Calgary approved this study (Ethics ID: REB19-1000).

381 **Consent for publication:** Not applicable.

382 **Competing interests:** The authors declare that they have no competing interests.

383 **Availability of data and materials:** Data cannot be shared publicly because of patient  
384 confidentiality. Data may be available upon reasonable request from the University of  
385 Calgary research ethics board and Alberta Health Services research and innovation  
386 administration (contact via chreb@ucalgary.ca and research.administration@ahs.ca) for  
387 researchers who meet the criteria for access to confidential data.

388 **Funding:** SJM was supported by a Canadian Institutes of Health Research Doctoral Research  
389 Award. The funder had no role in study design, data collection and analysis, decision to  
390 publish, or preparation of the manuscript; no financial relationships with any organizations  
391 that might have an interest in the submitted work in the previous three years; no other  
392 relationships or activities that could have influenced the submitted work.

393 **Authors' contributions:** All designated as authors have met ICMJE criteria for authorship.

394 1. Substantial contributions to the conception or design of the work; or the acquisition,  
395 analysis, or interpretation of data for the work; AND

396 2. Drafting the work or revising it critically for important intellectual content; AND

397 3. Final approval of the version to be published; AND

398 4. Agreement to be accountable for all aspects of the work in ensuring that questions  
399 related to the accuracy or integrity of any part of the work are appropriately investigated  
400 and resolved.

401 All authors participated in the design and development of the protocol. SJM, KDK and KMF  
402 drafted the manuscript, and all authors read and approved the final manuscript.

403 **Acknowledgements:** The authors are grateful for the privilege of speaking with families  
404 during the ongoing pandemic. The authors would like to acknowledge the individuals who  
405 participated in developing (Bonnie Sept, Israt Yasmeen), reviewing (Melanie C. & Jillian  
406 Anglin, Chloe M. de Groot), and piloting the interview guide (Krista Wollny, Victoria Owen,  
407 Natalia Jaworska).

408

409 **REFERENCES**

- 410 1. Finfer S, Vincent JL: **Critical care--an all-encompassing specialty**. *N Engl J Med* 2013,  
411 **369**(7):669-670.
- 412 2. Wang S, Allen D, Kheir YN, Campbell N, Khan B: **Aging and Post-Intensive Care**  
413 **Syndrome: A Critical Need for Geriatric Psychiatry**. *Am J Geriatr Psychiatry* 2018,  
414 **26**(2):212-221.
- 415 3. Davidson JE, Jones C, Bienvenu OJ: **Family response to critical illness: postintensive**  
416 **care syndrome-family**. *Crit Care Med* 2012, **40**(2):618-624.
- 417 4. Nassar Junior AP, Besen B, Robinson CC, Falavigna M, Teixeira C, Rosa RG: **Flexible**  
418 **Versus Restrictive Visiting Policies in ICUs: A Systematic Review and Meta-**  
419 **Analysis**. *Crit Care Med* 2018, **46**(7):1175-1180.
- 420 5. Westphal GA, Moerschberger MS, Vollmann DD, Inacio AC, Machado MC, Sperotto G,  
421 Cavalcanti AB, Koenig A: **Effect of a 24-h extended visiting policy on delirium in**  
422 **critically ill patients**. *Intensive Care Med* 2018, **44**(6):968-970.
- 423 6. Davidson JE, Aslakson RA, Long AC, Puntillo KA, Kross EK, Hart J, Cox CE, Wunsch H,  
424 Wickline MA, Nunnally ME *et al*: **Guidelines for Family-Centered Care in the**  
425 **Neonatal, Pediatric, and Adult ICU**. *Crit Care Med* 2017, **45**(1):103-128.
- 426 7. **Family Visitation in the Adult Intensive Care Unit**. *Crit Care Nurse* 2017, **37**(4):88.
- 427 8. Cook D, Burns K, Finfer S, Kissoon N, Bhagwanjee S, Annane D, Sprung CL, Fowler R,  
428 Latronico N, Marshall J: **Clinical research ethics for critically ill patients: a pandemic**  
429 **proposal**. *Crit Care Med* 2010, **38**(4 Suppl):e138-142.
- 430 9. Subramanian S, Pamplin JC, Hravnak M, Hielsberg C, Riker R, Rincon F, Laudanski K,  
431 Adzhigirey LA, Moughrabieh MA, Winterbottom FA *et al*: **Tele-Critical Care: An**  
432 **Update From the Society of Critical Care Medicine Tele-ICU Committee**. *Crit Care*  
433 *Med* 2020, **48**(4):553-561.
- 434 10. Dhala A, Sasangohar F, Kash B, Ahmadi N, Masud F: **Rapid Implementation and**  
435 **Innovative Applications of a Virtual Intensive Care Unit During the COVID-19**  
436 **Pandemic: Case Study**. *J Med Internet Res* 2020, **22**(9):e20143.
- 437 11. Yardley S, Rolph M: **Death and dying during the pandemic**. *BMJ* 2020, **369**:m1472.
- 438 12. Rhee J, Grant M, Detering K, Clayton J, Arthurs K: **Dying still matters in the age of**  
439 **COVID-19**. *Aust J Gen Pract* 2020, **49**.

- 440 13. Valley TS, Schutz A, Nagle MT, Miles LJ, Lipman K, Ketcham SW, Kent M, Hibbard CE,  
441 Harlan EA, Hauschildt K: **Changes to Visitation Policies and Communication**  
442 **Practices in Michigan ICUs during the COVID-19 Pandemic.** *Am J Respir Crit Care*  
443 *Med* 2020, **202**(6):883-885.
- 444 14. Cook DJ, Takaoka A, Hoad N, Swinton M, Clarke FJ, Rudkowski JC, Heels-Ansdell D,  
445 Boyle A, Toledo F, Dennis BB *et al.* **Clinician Perspectives on Caring for Dying**  
446 **Patients During the Pandemic : A Mixed-Methods Study.** *Ann Intern Med* 2021,  
447 **174**(4):493-500.
- 448 15. Munshi L, Evans G, Razak F: **The case for relaxing no-visitor policies in hospitals**  
449 **during the ongoing COVID-19 pandemic.** *CMAJ* 2021, **193**(4):E135-E137.
- 450 16. Kim H, Sefcik JS, Bradway C: **Characteristics of Qualitative Descriptive Studies: A**  
451 **Systematic Review.** *Res Nurs Health* 2017, **40**(1):23-42.
- 452 17. Tong A, Sainsbury P, Craig J: **Consolidated criteria for reporting qualitative**  
453 **research (COREQ): a 32-item checklist for interviews and focus groups.** *Int J Qual*  
454 *Health Care* 2007, **19**(6):349-357.
- 455 18. Shulman RW, Kalra S, Jiang JZ: **Validation of the Sour Seven Questionnaire for**  
456 **screening delirium in hospitalized seniors by informal caregivers and untrained**  
457 **nurses.** *BMC Geriatr* 2016, **16**:44.
- 458 19. Burns KEA, Misak C, Herridge M, Meade MO, Oczkowski S, Patient, Family Partnership  
459 Committee of the Canadian Critical Care Trials G: **Patient and Family Engagement in**  
460 **the ICU. Untapped Opportunities and Underrecognized Challenges.** *Am J Respir*  
461 *Crit Care Med* 2018, **198**(3):310-319.
- 462 20. Braun V, Clarke V: **Using thematic analysis in psychology.** *Qualitative Research in*  
463 *Psychology* 2006, **3**(2):77-101.
- 464 21. Fereday J, Muir-Cochrane E: **Demonstrating Rigor Using Thematic Analysis: A**  
465 **Hybrid Approach of Inductive and Deductive Coding and Theme Development.**  
466 *International Journal of Qualitative Methods* 2006, **5**(1):80-92.
- 467 22. Oxenboll-Collet M, Egerod I, Christensen V, Jensen J, Thomsen T: **Nurses' and**  
468 **physicians' perceptions of Confusion Assessment Method for the intensive care**  
469 **unit for delirium detection: focus group study.** *Nurs Crit Care* 2018, **23**(1):16-22.
- 470 23. Sandelowski M: **What's in a name? Qualitative description revisited.** *Res Nurs*  
471 *Health* 2010, **33**(1):77-84.

- 472 24. Brown SM, Azoulay E, Benoit D, Butler TP, Folcarelli P, Geller G, Rozenblum R, Sands  
 473 K, Sokol-Hessner L, Talmor D *et al*: **The Practice of Respect in the ICU**. *Am J Respir*  
 474 *Crit Care Med* 2018, **197**(11):1389-1395.
- 475 25. Andrist E, Clarke RG, Harding M: **Paved With Good Intentions: Hospital Visitation**  
 476 **Restrictions in the Age of Coronavirus Disease 2019**. *Pediatr Crit Care Med* 2020,  
 477 **21**(10):e924-e926.
- 478 26. October T, Dryden-Palmer K, Copnell B, Meert KL: **Caring for Parents After the**  
 479 **Death of a Child**. *Pediatr Crit Care Med* 2018, **19**(8S Suppl 2):S61-S68.
- 480 27. **AHS COVID-19 PROVINCIAL GUIDANCE FOR DESIGNATED SUPPORT AND**  
 481 **VISITOR ACCESS IN ACUTE, AMBULATORY AND EMERGENCY/URGENT CARE**. In.:  
 482 Alberta Health Services; 2021.
- 483 28. **Visitor guidelines during COVID-19**. In.: Fraser Health; 2021.
- 484 29. **Update Visitor Policy for COVID-19**. In.: University of Michigan Health; 2021.
- 485 30. **General Visitation Guidelines**. In.: New York Presbyterian Hospitals; 2021.
- 486 31. Kent EE, Ornstein KA, Dionne-Odom JN: **The Family Caregiving Crisis Meets an**  
 487 **Actual Pandemic**. *J Pain Symptom Manage* 2020, **60**(1):e66-e69.
- 488 32. Cattelan J, Castellano S, Merdji H, Audusseau J, Claude B, Feuillassier L, Cunat S, Astrie  
 489 M, Aquin C, Buis G *et al*: **Psychological effects of remote-only communication**  
 490 **among reference persons of ICU patients during COVID-19 pandemic**. *J Intensive*  
 491 *Care* 2021, **9**(1):5.
- 492 33. Leggett A, Carmichael A, Leonard N, Robinson-Lane S, Li S, Oxford G, Wisniewski M,  
 493 Gonzalez R: **Family Caregivers on the Frontline: Challenges of Providing Care to**  
 494 **Post-ICU COVID-19 Patients**. *Innov Aging* 2020, **4**(Suppl 1):946-946.
- 495 34. Markowitz DM, Shoots-Reinhard B, Peters E, Silverstein MC, Goodwin R, Bjalkebring P:  
 496 **Dehumanization During the COVID-19 Pandemic**. *Front Psychol* 2021, **12**:634543.
- 497 35. Downar J, Kekewich M: **Improving family access to dying patients during the**  
 498 **COVID-19 pandemic**. *Lancet Respir Med* 2021, **9**(4):335-337.
- 499 36. Voo TC, Senguttuvan M, Tam CC: **Family Presence for Patients and Separated**  
 500 **Relatives During COVID-19: Physical, Virtual, and Surrogate**. *J Bioeth Inq* 2020,  
 501 **17**(4):767-772.
- 502 37. Munshi L, Evans G, Razak F: **The case for relaxing no-visitor policies in hospitals**  
 503 **during the ongoing COVID-19 pandemic**. *Canadian Medical Association Journal*  
 504 2021, **193**(4):E135.

- 505 38. Budnick A, Hering C, Eggert S, Teubner C, Suhr R, Kuhlmeier A, Gellert P: **Informal**  
506 **caregivers during the COVID-19 pandemic perceive additional burden: findings**  
507 **from an ad-hoc survey in Germany.** *BMC Health Serv Res* 2021, **21**(1):353.
- 508 39. Stall NM, Johnstone J, McGeer AJ, Dhuper M, Dunning J, Sinha SK: **Finding the Right**  
509 **Balance: An Evidence-Informed Guidance Document to Support the Re-Opening**  
510 **of Canadian Nursing Homes to Family Caregivers and Visitors during the**  
511 **Coronavirus Disease 2019 Pandemic.** *J Am Med Dir Assoc* 2020, **21**(10):1365-1370  
512 e1367.
- 513 40. Tupper SM, Ward H, Parmar J: **Family Presence in Long-Term Care During the**  
514 **COVID-19 Pandemic: Call to Action for Policy, Practice, and Research.** *Can Geriatr*  
515 *J* 2020, **23**(4):335-339.
- 516 41. Zeh RD, Santry HP, Monsour C, Sumski AA, Bridges JFP, Tsung A, Pawlik TM, Cloyd  
517 JM: **Impact of visitor restriction rules on the postoperative experience of COVID-**  
518 **19 negative patients undergoing surgery.** *Surgery* 2020, **168**(5):770-776.
- 519 42. Belli LF: **[Recommendations for communicating bad news by phone during the**  
520 **SARS-CoV-2 pandemic Recomendacoes para a comunicacao de mas noticias por**  
521 **telefone durante a pandemia do SARS-CoV-2].** *Recomendaciones para la*  
522 *comunicacion de malas noticias por telefono durante la pandemia por SARS-CoV-2*  
523 2020, **44**:e69.
- 524 43. Griffin KM, Karas MG, Ivascu NS, Lief L: **Hospital Preparedness for COVID-19: A**  
525 **Practical Guide from a Critical Care Perspective.** *American Journal of Respiratory &*  
526 *Critical Care Medicine* 2020, **201**(11):1337-1344.
- 527 44. Janssen DJA, Ekstrom M, Currow DC, Johnson MJ, Maddocks M, Simonds AK, Tonia T,  
528 Marsaa K: **COVID-19: guidance on palliative care from a European Respiratory**  
529 **Society international task force.** *European Respiratory Journal* 2020, **56**(3):2002583.
- 530 45. Landa-Ramírez E, Domínguez-Vieyra NA, Hernández-Nuñez ME, Díaz-Vásquez LP,  
531 Santana-García IA: **Psychological Support During COVID-19 Death Notifications:**  
532 **Clinical Experiences From a Hospital in Mexico.** *Psychological Trauma: Theory,*  
533 *Research, Practice & Policy* 2020, **12**:518-520.
- 534 46. Lissoni B, Del Negro S, Brioschi P, Casella G, Fontana I, Bruni C, Lamiani G: **Promoting**  
535 **Resilience in the Acute Phase of the COVID-19 Pandemic: Psychological**  
536 **Interventions for Intensive Care Unit (ICU) Clinicians and Family Members.**  
537 *Psychological Trauma: Theory, Research, Practice & Policy* 2020, **12**:S105-S107.

- 538 47. Viaux S, Maurice P, Cohen D, Jouannic JM: **Giving birth under lockdown during the**  
539 **COVID-19 epidemic.** *Journal of Gynecology Obstetrics and Human Reproduction*  
540 2020, **49(6):101785.**
- 541 48. Robinson SM, Mackenzie-Ross S, Campbell Hewson GL, Egleston CV, Prevost AT:  
542 **Psychological effect of witnessed resuscitation on bereaved relatives.** *Lancet* 1998,  
543 **352(9128):614-617.**
- 544 49. Robinson A, Thomson R: **Variability in patient preferences for participating in**  
545 **medical decision making: implication for the use of decision support tools.** *Qual*  
546 *Health Care* 2001, **10 Suppl 1:i34-38.**
- 547 50. Azoulay E, Chevret S, Leleu G, Pochard F, Barboteu M, Adrie C, Canoui P, Le Gall JR,  
548 Schlemmer B: **Half the families of intensive care unit patients experience**  
549 **inadequate communication with physicians.** *Crit Care Med* 2000, **28(8):3044-3049.**
- 550 51. Hudson P, Trauer T, Kelly B, O'Connor M, Thomas K, Summers M, Zordan R, White V:  
551 **Reducing the psychological distress of family caregivers of home-based palliative**  
552 **care patients: short-term effects from a randomised controlled trial.**  
553 *Psychooncology* 2013, **22(9):1987-1993.**
- 554 52. Azoulay E, Pochard F, Chevret S, Arich C, Brivet F, Brun F, Charles PE, Desmettre T,  
555 Dubois D, Galliot R *et al.* **Family participation in care to the critically ill: opinions of**  
556 **families and staff.** *Intensive Care Med* 2003, **29(9):1498-1504.**
- 557 53. Davidson JE, Daly BJ, Agan D, Brady NR, Higgins PA: **Facilitated sensemaking: a**  
558 **feasibility study for the provision of a family support program in the intensive**  
559 **care unit.** *Crit Care Nurs Q* 2010, **33(2):177-189.**
- 560 54. Davidson JE, Zisook S: **Implementing Family-Centered Care Through Facilitated**  
561 **Sensemaking.** *AACN Adv Crit Care* 2017, **28(2):200-209.**
- 562 55. Dirik A, Sandhu S, Giacco D, Barrett K, Bennison G, Collinson S, Priebe S: **Why involve**  
563 **families in acute mental healthcare? A collaborative conceptual review.** *BMJ Open*  
564 2017, **7(9):e017680.**
- 565 56. Felten-Barentsz KM, van de Wetering-van Dongen VA, Vloet L, Koenders N, Nijhuis-  
566 van der Sanden MWG, Hoogeboom TJ: **Family participation during physical activity**  
567 **in the intensive care unit: A longitudinal qualitative study.** *Journal of Critical Care*  
568 2021.
- 569 57. Naef R, von Felten S, Ernst J: **Factors influencing post-ICU psychological distress in**  
570 **family members of critically ill patients: a linear mixed-effects model.**  
571 *Biopsychosoc Med* 2021, **15(1):4.**

- 572 58. Cano A, Scaturio DJ, Sprafkin RP, Lantinga LJ, Fiese BH, Brand F: **Family Support, Self-**  
573 **Rated Health, and Psychological Distress.** *Prim Care Companion J Clin Psychiatry*  
574 2003, **5(3):111-117.**
- 575 59. Wasser T, Pasquale MA, Matchett SC, Bryan Y, Pasquale M: **Establishing reliability**  
576 **and validity of the critical care family satisfaction survey.** *Crit Care Med* 2001,  
577 **29(1):192-196.**
- 578 60. Marsden C: **Family-centered critical care: an option or obligation?** *Am J Crit Care*  
579 1992, **1(3):115-117.**
- 580 61. Quill TE, Brody H: **Physician recommendations and patient autonomy: finding a**  
581 **balance between physician power and patient choice.** *Ann Intern Med* 1996,  
582 **125(9):763-769.**
- 583 62. Benatti SV: **Love in the Time of Corona.** *Ann Intern Med* 2020, **172(9):628.**
- 584 63. Landry A, Ouchi K: **Story of human connection.** *Emerg Med J* 2020, **37(8):526.**
- 585 64. Neville TH: **COVID-19: A Time for Creative Compassion.** *J Palliat Med* 2020,  
586 **23(7):990-991.**
- 587 65. Life Lines Team c: **Restricted family visiting in intensive care during COVID-19.**  
588 *Intensive Crit Care Nurs* 2020, **60:102896.**
- 589 66. Chochinov HM, McClement S, Hack T, Thompson G, Dufault B, Harlos M: **Eliciting**  
590 **Personhood Within Clinical Practice: Effects on Patients, Families, and Health Care**  
591 **Providers.** *J Pain Symptom Manage* 2015, **49(6):974-980 e972.**
- 592 67. Choi J, Son YJ, Tate JA: **Exploring positive aspects of caregiving in family**  
593 **caregivers of adult ICU survivors from ICU to four months post-ICU discharge.**  
594 *Heart Lung* 2019, **48(6):553-559.**
- 595 68. Hennink MM, Kaiser BN, Marconi VC: **Code Saturation Versus Meaning Saturation:**  
596 **How Many Interviews Are Enough?** *Qual Health Res* 2017, **27(4):591-608.**
- 597 69. Ortega G, Rodriguez JA, Maurer LR, Witt EE, Perez N, Reich A, Bates DW:  
598 **Telemedicine, COVID-19, and disparities: Policy implications.** *Health Policy Technol*  
599 2020, **9(3):368-371.**
- 600 70. Chua IS, Jackson V, Kamdar M: **Webside Manner during the COVID-19 Pandemic:**  
601 **Maintaining Human Connection during Virtual Visits.** *J Palliat Med* 2020,  
602 **23(11):1507-1509.**
- 603
- 604



605 **FIGURE CAPTIONS**

606 **Figure 1.** Flow diagram of selection of family caregivers for interviews

607 **SUPPORTING INFORMATION**

608 **S Table 1.** Consolidated criteria for reporting qualitative studies (COREQ)

609 **S Table 2.** Interview guide

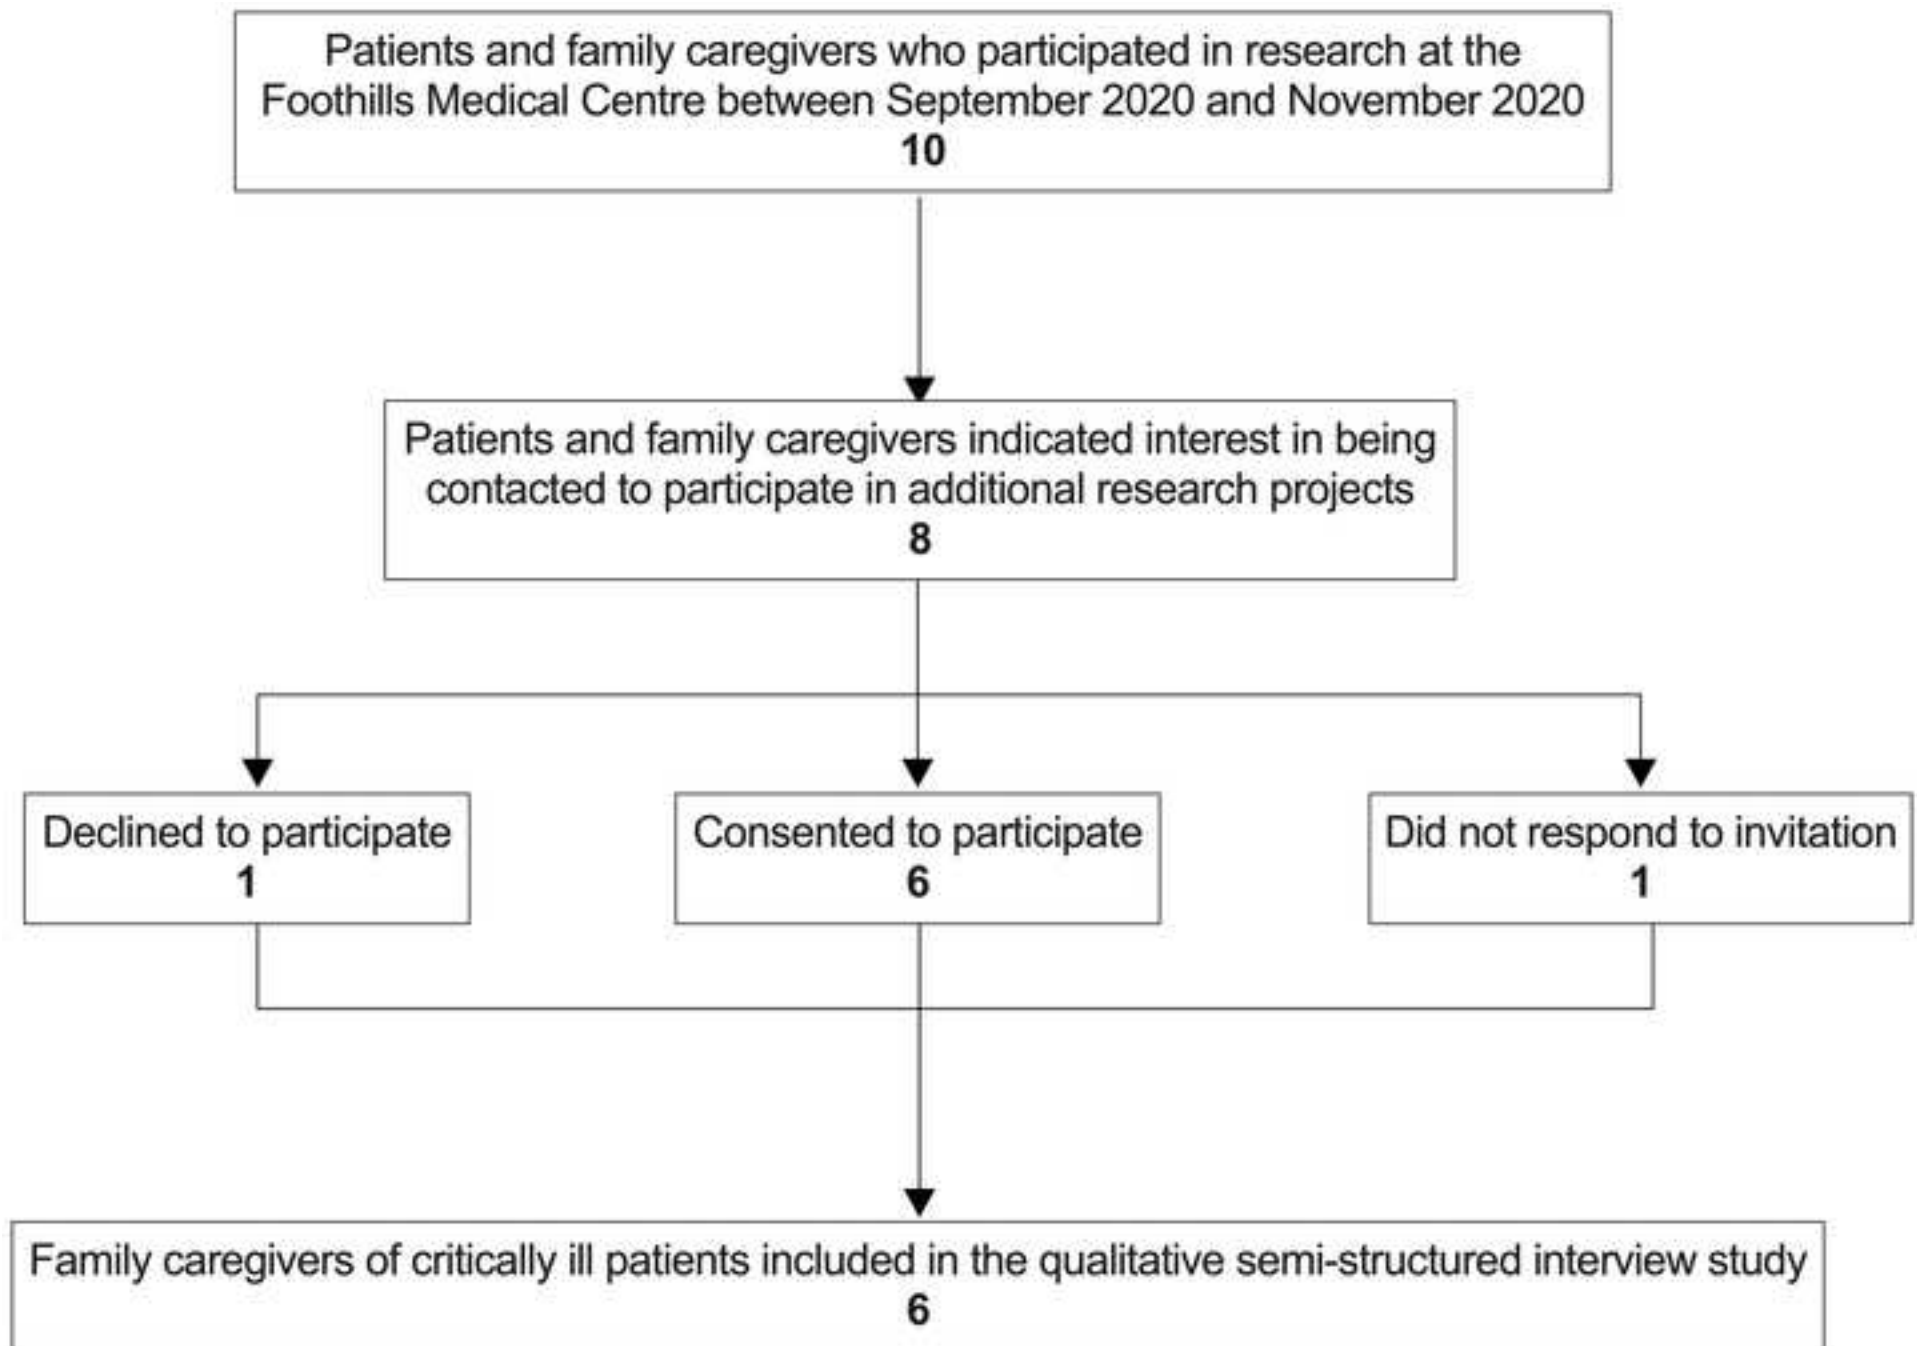

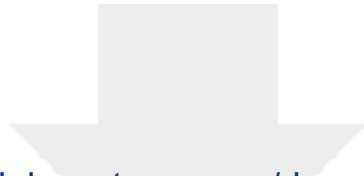

Click here to access/download  
**Supporting Information**  
S Table 1.docx

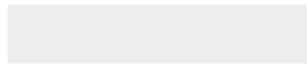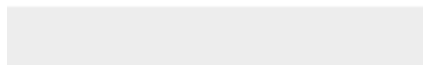

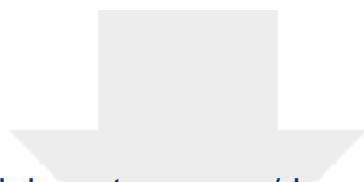

Click here to access/download  
**Supporting Information**  
S Table 2.docx

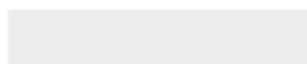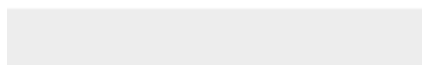

Supplement: pone.0275310.s003.pdf [file pone.0275310.s003.pdf]
